# Supplementary material
Source: Springer Nature journal article supplement (https://www.springermedizin.de/resource/supplementary/12876_2014_1140_MOESM1_ESM.docx/9438194)
Supplement: MOESM1 [file 9438194]

Table 1. Demographic data of statin users (n=272) and non-statin users (n=272) patients with gallstones

_________________________________________________________________________________________________________________

**Statin users** (n=272) **No statin** (n=272) P-value

Females/males 132/140 (48 %/52 %) 132/140 (48 %/52%) 1.000

Age (years) 69 ± 11 (36-93) 69 ± 11 (36-93) 0.786

Body mass index (Kg/m²) 29 ± 4.2 28 ± 4.9 0.499

Use of statins

Simvastatin 73 % 199

Atorvastatiini 13 % 36

Rosuvastatin 6 % 15

Fluvastatin 4 % 11

Pravastatin 2 % 5

Lovastatin 1 % 3

Other1 1 % 3

Comorbid condition

Hypertension 161 (59 %) 115 (42 %) < 0.001

Diabetes 48 (18%) 38 (14%) 0.290

Coronary artery disease/

Coronary heart failure/

Valvular 151 (56%) 71 (26%) < 0.001

Neurological 50 (18%) 48 (18%) 0.456

Psychiatric 16 (6%) 22 (8%) 0.401

Pulmonary 32 (12%) 37 (14%) 0.303

Rheumatoid 12 (4%) 12 (4%) 1.000

Malignancy 26 (10%) 33 (12%) 0.408

Number of medication

No 0 75 (28%)

1-3 drug 44 (16%) 88 (32%)

> 4 drugs 228 (84%) 109 (40%)

____________________________________________________________________________________________________________

1 means combination of statin with other cholesterol-lowering drugs (fenofibrate, ezetimibe)

Values are presented as number (percentage) or mean (SD, min-max), as appropriate.
